# Supplementary material
Source: PubMed Central journal article supplement (PMC6370529)
Supplement: NIHMS978729-supplement.pdf [file NIHMS978729-supplement.pdf]

**Supplemental Results:**

**Table S1. Additional BP Outcomes in the Intervention and Control Groups<sup>†</sup>**

|                                              | Intervention |              | Control   |              | ANOVA <i>P</i> -Values |             |                     |
|----------------------------------------------|--------------|--------------|-----------|--------------|------------------------|-------------|---------------------|
|                                              | Pre-Study    | During Study | Pre-Study | During Study | Group Effect           | Time Effect | Inter-action Effect |
| <b>Average Highest SBP (mm Hg)</b>           | 155 ± 21     | 153 ± 15     | 174 ± 17  | 172 ± 13     | <0.0001*               | 0.41        | 0.94                |
| <b>Average Lowest SBP (mm Hg)</b>            | 111 ± 15     | 108 ± 11     | 118 ± 14  | 122 ± 16     | 0.0006*                | 0.82        | 0.26                |
| <b>Max. Value of the Highest SBP (mm Hg)</b> | 188 ± 27     | 192 ± 25     | 207 ± 21  | 206 ± 25     | 0.01*                  | 0.77        | 0.64                |
| <b>Min. Value of the Lowest SBP (mm Hg)</b>  | 86 ± 19      | 83 ± 16      | 92 ± 15   | 90 ± 16      | 0.07                   | 0.52        | 0.93                |
| <b>Average Highest MAP (mm Hg)</b>           | 102 ± 12     | 101 ± 7      | 113 ± 13  | 112 ± 11     | <0.0001*               | 0.52        | 0.90                |
| <b>Average Lowest MAP (mm Hg)</b>            | 77 ± 10      | 75 ± 8       | 81 ± 9    | 84 ± 11      | 0.0003*                | 0.92        | 0.18                |
| <b>Max. Value of the Highest MAP (mm Hg)</b> | 130 ± 17     | 132 ± 18     | 135 ± 22  | 138 ± 20     | 0.12                   | 0.50        | 0.86                |
| <b>Min. Value of the Lowest MAP (mm Hg)</b>  | 60 ± 12      | 60 ± 10      | 62 ± 9    | 63 ± 9       | 0.35                   | 0.85        | 0.73                |

<sup>†</sup>Data are presented as mean ± SD; SBP, systolic blood pressure; MAP, mean arterial pressure. “Average”, “highest”, and “lowest” values refer to over the 25 during study dialysis sessions for each patient.

\**p* < 0.05
